# Supplementary material for: Can metaphyseal variations in the distal femurs and proximal tibias be distinguished from classic metaphyseal lesions?
Source: Research Square preprint supplement (doi:10.21203/rs.3.rs-6831876/v1), 2025-06-17
Supplement: Supplementary file 1 [file 5b12359299d843900d26463d.docx]

**Supplementary Table 2.** Location of the radiographic signs within the metaphysis in the tibias

| Radiographic sign | Examiner | N  N* | One location | | | | Two locations | | | | | | ≥ 3 locations |
| --- | --- | --- | --- | --- | --- | --- | --- | --- | --- | --- | --- | --- | --- |
| Anterior | Posterior | Lateral | Medial | Anterior medial | Anterior lateral | Posterior medial | Posterior lateral | Anterior posterior | Medial lateral |
| Spur | All | 5 | 0 | 1 (20%) | 0 | 1 (20%) | 0 | 0 | 2 (40%) | 0 | 0 | 0 | 1 (20%) |
| Pediatric | 3 | 0 | 0 | 0 | 1 (33.3%) | 0 | 0 | 2 (66.7%) | 0 | 0 | 0 | 0 |
| General | 2 | 0 | 1 (50%) | 0 | 0 | 0 | 0 | 0 | 0 | 0 | 0 | 1 (50%) |
| Step Off | All | 9 | 2 (22.2%) | 0 | 0 | 7 (77.8%) | 0 | 0 | 0 | 0 | 0 | 0 | 0 |
| Pediatric | 6 | 2 (33.3%) | 0 | 0 | 4 (66.7%) | 0 | 0 | 0 | 0 | 0 | 0 | 0 |
| General | 3 | 0 | 0 | 0 | 3 (100%) | 0 | 0 | 0 | 0 | 0 | 0 | 0 |
| Fragmentation | All | 69 | 1 (1.4%) | 1 (1.4%) | 0 | 62 (89.9%) | 0 | 0 | 5 (7.2%) | 0 | 0 | 0 | 0 |
| Pediatric | 49 | 0 | 1 (2%) | 0 | 43 (87.8%) | 0 | 0 | 5 (10.2%) | 0 | 0 | 0 | 0 |
| General | 20 | 1 (5%) | 0 | 0 | 19 (95%) | 0 | 0 | 0 | 0 | 0 | 0 | 0 |
| Corner Fracture | All | 57 | 0 | 6 (10.5%) | 0 | 25 (43.9%) | 1 (1.8%) | 0 | 16 (28.1%) | 0 | 7 (12.3%) | 0 | 2 (3.5%) |
| Pediatric | 20 | 0 | 0 | 0 | 8 (40%) | 1 (5%) | 0 | 6 (30%) | 0 | 3 (15%) | 0 | 2 (10%) |
| General | 37 | 0 | 6 (16.2%) | 0 | 17 (45.9%) | 0 | 0 | 10 (27%) | 0 | 4 (10.8%) | 0 | 0 |
| Bucket Handle | All | 59 | 0 | 1 (1.7%) | 1 (1.7%) | 8 (13.6%) | 1 (1.7%) | 0 | 5 (8.5%) | 0 | 0 | 0 | 43 (72.9%) |
| Pediatric | 25 | 0 | 1 (4%) | 0 | 3 (12%) | 1 (4%) | 0 | 4 (16%) | 0 | 0 | 0 | 16 (64%) |
| General | 34 | 0 | 0 | 1 (2.9%) | 5 (14.7%) | 0 | 0 | 1 (2.9%) | 0 | 0 | 0 | 27 (79.4%) |
| Subphyseal Lucency | All | 8 | 0 | 3 (37.5%) | 0 | 4 (50%) | 0 | 0 | 0 | 0 | 0 | 0 | 1 (12.5%) |
| Pediatric | 2 | 0 | 1 (50%) | 0 | 1 (50%) | 0 | 0 | 0 | 0 | 0 | 0 | 0 |
| General | 6 | 0 | 2 (33.3%) | 0 | 3 (50%) | 0 | 0 | 0 | 0 | 0 | 0 | 1 (16.7%) |
| Deformed Corner | All | 11 | 0 | 1 (9.1%) | 0 | 9 (81.8%) | 0 | 0 | 0 | 0 | 0 | 0 | 1 (9.1%) |
| Pediatric | 8 | 0 | 1 (12.5%) | 0 | 6 (75%) | 0 | 0 | 0 | 0 | 0 | 0 | 1 (12.5%) |
| General | 3 | 0 | 0 | 0 | 3 (100%) | 0 | 0 | 0 | 0 | 0 | 0 | 0 |
| Metaphyseal Irregularity | All | 41 | 1 (2.4%) | 1 (2.4%) | 0 | 2 (4.9%) | 1 (2.4%) | 0 | 1 (2.4%) | 0 | 0 | 2 (4.9%) | 33 (80.5%) |
| Pediatric | 22 | 1 (4.5%) | 0 | 0 | 2 (9.1%) | 1 (4.5%) | 0 | 1 (4.5%) | 0 | 0 | 2 (9.1%) | 15 (68.2%) |
| General | 19 | 0 | 1 (5.3%) | 0 | 0 | 0 | 0 | 0 | 0 | 0 | 0 | 18 (94.7%) |
| Subperiosteal New Bone Formation | All | 1 | 0 | 0 | 0 | 0 | 0 | 0 | 0 | 1 (100%) | 0 | 0 | 0 |
| Pediatric | 1 | 0 | 0 | 0 | 0 | 0 | 0 | 0 | 1 (100%) | 0 | 0 | 0 |
| General | 0 | 0 | 0 | 0 | 0 | 0 | 0 | 0 | 0 | 0 | 0 | 0 |

N- Overall number of femurs reviewed by all 8 radiologists and 4 pediatric and general radiologists when the radiologist indicated presence of one type of sign
