# Supplementary material for: Can metaphyseal variations in the distal femurs and proximal tibias be distinguished from classic metaphyseal lesions?
Source: Research Square preprint supplement (doi:10.21203/rs.3.rs-6831876/v1), 2025-06-17
Supplement: Supplementary file 2 [file cb230c39ab0536e7d87a6e91.docx]

**Supplementary Table 1.** Location of the radiographic signs within the metaphysis in the femurs

| Radiographic sign | Examiner | N  N* | One location | | | | Two locations | | | | | | ≥ 3 locations |
| --- | --- | --- | --- | --- | --- | --- | --- | --- | --- | --- | --- | --- | --- |
| Anterior | Posterior | Lateral | Medial | Anterior medial | Anterior lateral | Posterior medial | Posterior lateral | Anterior posterior | Medial lateral |
| Spur | All | 61 | 3 (4.9%) | 0 | 38 (62.3%) | 4 (6.6%) | 0 | 9 (14.8%) | 2 (3.3%) | 0 | 0 | 4 (6.6%) | 1 (1.6%) |
| Pediatric | 25 | 3 (12%) | 0 | 14 (56%) | 2 (8%) | 0 | 6 (24%) | 0 | 0 | 0 | 0 | 0 |
| General | 36 | 0 | 0 | 24 (66.7%) | 2 (5.6%) | 0 | 3 (8.3%) | 2 (5.6%) | 0 | 0 | 4 (11.1%) | 1 (2.8%) |
| Step Off | All | 36 | 0 | 9 (25%) | 11 (30.6%) | 11 (30.6%) | 0 | 0 | 3 (8.3%) | 1 (2.8%) | 0 | 1 (2.8%) | 0 |
| Pediatric | 18 | 0 | 3 (16.7%) | 7 (38.9%) | 7 (38.9%) | 0 | 0 | 1 (5.6%) | 0 | 0 | 0 | 0 |
| General | 18 | 0 | 6 (33.3%) | 4 (22.2%) | 4 (22.2%) | 0 | 0 | 2 (11.1%) | 1 (5.6%) | 0 | 1 (5.6%) | 0 |
| Fragmentation | All | 259 | 0 | 120 (46.3%) | 2 (0.8%) | 40 (15.4%) | 0 | 0 | 88 (34%) | 6 (2.3%) | 0 | 3 (1.2%) | 0 |
| Pediatric | 142 | 0 | 58 (40.8%) | 1 (0.7%) | 21 (14.8%) | 0 | 0 | 58 (40.8%) | 2 (1.4%) | 0 | 2 (1.4%) | 0 |
| General | 117 | 0 | 62 (53%) | 1 (0.9%) | 19 (16.2%) | 0 | 0 | 30 (25.6%) | 4 (3.4%) | 0 | 1 (0.9%) | 0 |
| Corner Fracture | All | 117 | 0 | 16 (13.7%) | 18 (15.4%) | 37 (31.6%) | 0 | 2 (1.7%) | 22 (18.8%) | 7 (6%) | 2 (1.7%) | 6 (5.1%) | 7 (6%) |
| Pediatric | 48 | 0 | 4 (8.3%) | 8 (16.7%) | 11 (22.9%) | 0 | 2 (4.2%) | 14 (29.2%) | 3 (6.3%) | 0 | 1 (2.1%) | 5 (10.4%) |
| General | 69 | 0 | 12 (17.4%) | 10 (14.5%) | 26 (37.7%) | 0 | 0 | 8 (11.6%) | 4 (5.8%) | 2 (2.9%) | 5 (7.2%) | 2 (2.9%) |
| Bucket Handle | All | 60 | 1 (1.7%) | 2 (3.3%) | 8 (13.3%) | 2 (3.3%) | 1 (1.7%) | 3 (5%) | 1 (1.7%) | 0 | 0 | 0 | 42 (70%) |
| Pediatric | 25 | 0 | 0 | 0 | 0 | 1 (4%) | 1 (4%) | 1 (4%) | 0 | 0 | 0 | 22 (88%) |
| General | 35 | 1 (2.9%) | 2 (5.7%) | 8 (22.9%) | 2 (5.7%) | 0 | 2 (5.7%) | 0 | 0 | 0 | 0 | 20 (57.1%) |
| Subphyseal Lucency | All | 13 | 0 | 1 (7.7%) | 5 (38.5%) | 6 (46.2%) | 0 | 0 | 1 (7.7%) | 0 | 0 | 0 | 0 |
| Pediatric | 2 | 0 | 1 (50%) | 1 (50%) | 0 | 0 | 0 | 0 | 0 | 0 | 0 | 0 |
| General | 11 | 0 | 0 | 4 (36.4%) | 6 (54.5%) | 0 | 0 | 1 (9.1%) | 0 | 0 | 0 | 0 |
| Deformed Corner | All | 24 | 0 | 4 (16.7%) | 3 (12.5%) | 15 (62.5%) | 0 | 0 | 0 | 0 | 0 | 2 (8.3%) | 0 |
| Pediatric | 15 | 0 | 2 (13.3%) | 3 (20%) | 9 (60%) | 0 | 0 | 0 | 0 | 0 | 1 (6.7%) | 0 |
| General | 9 | 0 | 2 (22.2%) | 0 | 6 (66.7%) | 0 | 0 | 0 | 0 | 0 | 1 (11.1%) | 0 |
| Metaphyseal Irregularity | All | 38 | 0 | 2 (5.3%) | 0 | 0 | 0 | 0 | 0 | 1 (2.6%) | 1 (2.6%) | 2 (5.3%) | 32 (84.2%) |
| Pediatric | 7 | 0 | 1 (14.3%) | 0 | 0 | 0 | 0 | 0 | 0 | 0 | 2 (28.6%) | 4 (57.1%) |
| General | 31 | 0 | 1 (3.2%) | 0 | 0 | 0 | 0 | 0 | 1 (3.2%) | 1 (3.2%) | 0 | 28 (90.3%) |
| Subperiosteal New Bone Formation | All | 5 | 0 | 0 | 0 | 0 | 0 | 1 (20%) | 0 | 0 | 1 (20%) | 0 | 3 (60%) |
| Pediatric | 4 | 0 | 0 | 0 | 0 | 0 | 1 (25%) | 0 | 0 | 0 | 0 | 3 (75%) |
| General | 1 | 0 | 0 | 0 | 0 | 0 | 0 | 0 | 0 | 1 (100%) | 0 | 0 |

N- Overall number of femurs reviewed by all 8 radiologists and 4 pediatric and general radiologists when the radiologist indicated presence of one sign
